# Supplementary material for: Effects of advertisements on smokers’ interest in trying e-cigarettes: the roles of product comparison and visual cues
Source: PubMed Central journal article supplement — Tob Control. 2014 Jul;23(Suppl 3):iii31–6. doi: 10.1136/tobaccocontrol-2014-051718 (PMC4078668; doi:10.1136/tobaccocontrol-2014-051718), 2014-07

**Online Supplemental Material.** Four of twenty-four advertisements used in the experiment.

Comparison type: difference. Image: no e-cigarette.

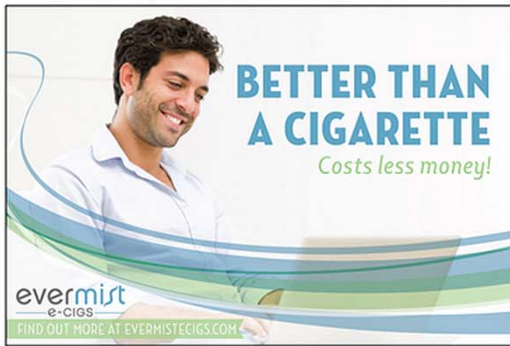

Comparison type: similarity. Image: e-cigarette kit.

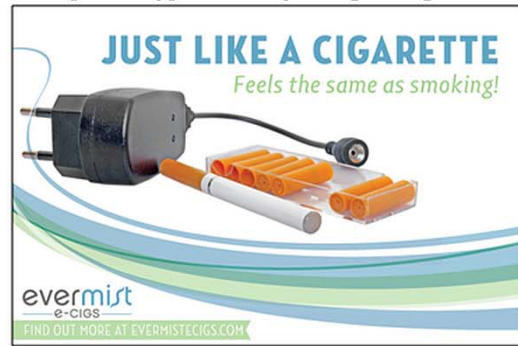

Comparison type: Control. Image: person using e-cigarette.

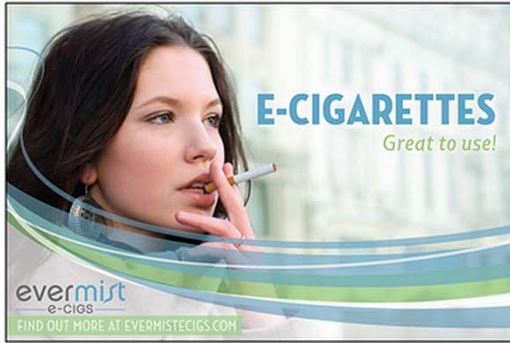

Comparison type: Difference. Image: person using e-cigarette.

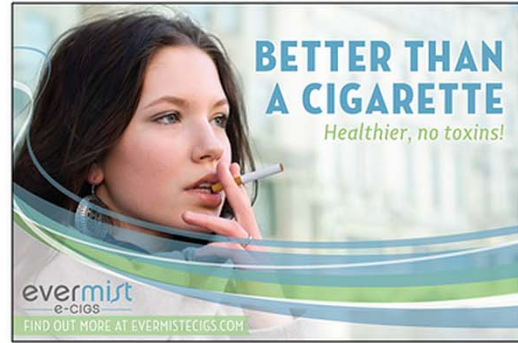

Supplement: tobaccocontrol-2014-051718-s1.pdf [file tobaccocontrol-2014-051718-s1.pdf]
